# Supplementary material for: A reporting checklist for HealthMeasures’ patient-reported outcomes: ASCQ-Me, Neuro-QoL, NIH Toolbox, and PROMIS
Source: PubMed Central journal article supplement (PMC7096598; doi:10.1186/s41687-020-0176-4), 2020-03-26
Supplement: 41687_2020_176_MOESM1_ESM.pdf [file 41687_2020_176_MOESM1_ESM.pdf]

| Status                                                        | Requirement                                                                                                                                                                              | Examples                                                                                                                                                                                                                                                                                  |
|---------------------------------------------------------------|------------------------------------------------------------------------------------------------------------------------------------------------------------------------------------------|-------------------------------------------------------------------------------------------------------------------------------------------------------------------------------------------------------------------------------------------------------------------------------------------|
| <b>Measure Details</b>                                        |                                                                                                                                                                                          |                                                                                                                                                                                                                                                                                           |
| <input type="checkbox"/> Done                                 | The first mention of a measurement system should include the full name of the measurement system                                                                                         | Adult Sickle Cell Quality of Life Measurement Information System (ASCQ-Me); Quality of Life in Neurological Disorders (Neuro-QoL); NIH Toolbox for the Assessment of Neurological and Behavioral Function(NIH Toolbox); Patient-Reported Outcomes Measurement Information System (PROMIS) |
| <input type="checkbox"/> Done                                 | Full domain name                                                                                                                                                                         | Ability to Participate in Social Roles and Activities                                                                                                                                                                                                                                     |
| <input type="checkbox"/> Done                                 | Version number                                                                                                                                                                           | v1.2                                                                                                                                                                                                                                                                                      |
| <input type="checkbox"/> Done                                 | Language(s) used in the study                                                                                                                                                            | English and Spanish                                                                                                                                                                                                                                                                       |
| <input type="checkbox"/> Done                                 | Respondents for whom measure was developed                                                                                                                                               | Adult; Pediatric; Parent Proxy                                                                                                                                                                                                                                                            |
| <input type="checkbox"/> Done                                 | Measure type                                                                                                                                                                             | Short form; Computer adaptive test (CAT); Profile Scale; Uncalibrated item pool; Numeric rating scale; Checklist                                                                                                                                                                          |
| <input type="checkbox"/> Done                                 | Measure citation                                                                                                                                                                         | Irwin, D., Gross, H., Stucky, B., et al. (2012). Development of six PROMIS pediatrics proxy-report item banks. <i>Health and Quality of Life Outcomes</i> , 10(1), 22.                                                                                                                    |
| <input type="checkbox"/> Done<br><input type="checkbox"/> N/A | Any modifications to the time frame, item text, or response options.                                                                                                                     | Because the Time 2 assessment occurred 5 days after Time 1, item text was changed from “In the past 7 days” to “In the past 3 days.”                                                                                                                                                      |
| <input type="checkbox"/> Done<br><input type="checkbox"/> N/A | For PROMIS and NIH Toolbox fixed-length short forms: the number of items and any letter designation                                                                                      | Depression 4a; PROMIS-29 Profile; 5-item Hostility Fixed Form                                                                                                                                                                                                                             |
| <input type="checkbox"/> Done<br><input type="checkbox"/> N/A | For custom short forms: how the items were selected, the item bank from which items were selected, and the number of items used.                                                         | Eight items reflecting poor functioning were selected from the Neuro-QoL v1.0 Lower Extremity Function Mobility Item Bank. Items were selected based upon their item characteristic curves and content.                                                                                   |
| <input type="checkbox"/> Done<br><input type="checkbox"/> N/A | If items or a full measure are reprinted in the publication, permission is required. Contact <a href="mailto:help@HealthMeasures.net">help@HealthMeasures.net</a> to request permission. |                                                                                                                                                                                                                                                                                           |
| <b>Administration</b>                                         |                                                                                                                                                                                          |                                                                                                                                                                                                                                                                                           |
| <input type="checkbox"/> Done                                 | Respondents who completed the measure                                                                                                                                                    | Self-report; Adult caregivers served as proxy respondents for patients                                                                                                                                                                                                                    |
| <input type="checkbox"/> Done                                 | Mode of administration                                                                                                                                                                   | Unassisted in a private area; Mailed to home; Interviewer administered in person; Interviewer administered by phone                                                                                                                                                                       |
| <input type="checkbox"/> Done                                 | Data collection tool                                                                                                                                                                     | paper; REDCap; OBERD; NIH Toolbox iPad app; Epic PROMIS app                                                                                                                                                                                                                               |
| <input type="checkbox"/> Done<br><input type="checkbox"/> N/A | Stopping parameters for CAT administration                                                                                                                                               | standard settings, maximum number of administered items in the CAT was changed from the default to 7                                                                                                                                                                                      |
| <b>Scoring</b>                                                |                                                                                                                                                                                          |                                                                                                                                                                                                                                                                                           |
| <input type="checkbox"/> Done                                 | Scoring method                                                                                                                                                                           | response-pattern scoring (used by HealthMeasures Scoring Service, REDCap auto-score, Assessment Center API, PROMIS and NIH Toolbox iPad apps); raw sum score to T-score look-up table (from Scoring Manual)                                                                               |
| <input type="checkbox"/> Done<br><input type="checkbox"/> N/A | Calibration sample used for scoring in the HealthMeasures Scoring Service or Assessment Center API; almost always “default”                                                              | default calibrations                                                                                                                                                                                                                                                                      |
| <input type="checkbox"/> Done<br><input type="checkbox"/> N/A | Look-up table used for scoring fixed length short forms, scales, and profiles, and discussion of how missing data were handled                                                           | Scoring tables published in the PROMIS Adult Profile Scoring Manual. Only short forms with responses to all four items were scored.                                                                                                                                                       |
| <b>Reporting</b>                                              |                                                                                                                                                                                          |                                                                                                                                                                                                                                                                                           |
| <input type="checkbox"/> Done<br><input type="checkbox"/> N/A | Measure scores should be presented as T-scores.                                                                                                                                          | Participants in the intervention group had moderate anxiety symptoms (Neuro-QoL T=65, SD=2.0).                                                                                                                                                                                            |
| <input type="checkbox"/> Done                                 | Keep T-scores on their original scale. Do not reverse scores numerically (e.g., do not change T=60 to T=40).                                                                             | Participants reported moderate impairment in fatigue (T=62.2, SD=2.0) and physical function (T=37.5, SD=2.1)                                                                                                                                                                              |
| <input type="checkbox"/> Done                                 | Report standard deviations with group means                                                                                                                                              | Mean fatigue scores improved from baseline (T=64.6, SD=2.0) to follow-up (T=55.1, SD=2.5)                                                                                                                                                                                                 |
